# Supplementary material for: Direct solar to hydrogen conversion enabled by silicon photocathodes with carrier selective passivated contacts
Source: Royal Society of Chemistry journal article supplement (doi:10.1039/d1se01260f), 2021-12-08
Supplement: d1se01260f1.pdf [file d1se01260f1.pdf]

# Direct solar to hydrogen conversion enabled by silicon photocathodes with carrier selective passivated contacts

*Astha Sharma<sup>1\*</sup>, The Duong<sup>1</sup>, Peng Liu<sup>3</sup>, Joshua Zheyang Soo<sup>2</sup>, Di Yan<sup>1</sup>, Doudou Zhang<sup>1</sup>,  
Asim Riaz<sup>2</sup>, Christian Samundsett<sup>1</sup>, Heping Shen<sup>1</sup>, Cheng Yang<sup>3</sup>, Siva Krishna Karuturi<sup>1,2\*</sup>,  
Kylie Catchpole<sup>1</sup> and Fiona J. Beck<sup>1</sup>*

1. School of Engineering, The Australian National University, Canberra, ACT 2601, Australia
2. Department of Electronic Materials Engineering, ANU Research School of Physics and Engineering, The Australian National University, Canberra, ACT 2601, Australia
3. Division of Energy and Environment, Shenzhen International Graduate School, Tsinghua University, Shenzhen, 518055 China

*\*Corresponding author-[astha.sharma@anu.edu.au](mailto:astha.sharma@anu.edu.au), [siva.karuturi@anu.edu.au](mailto:siva.karuturi@anu.edu.au)*

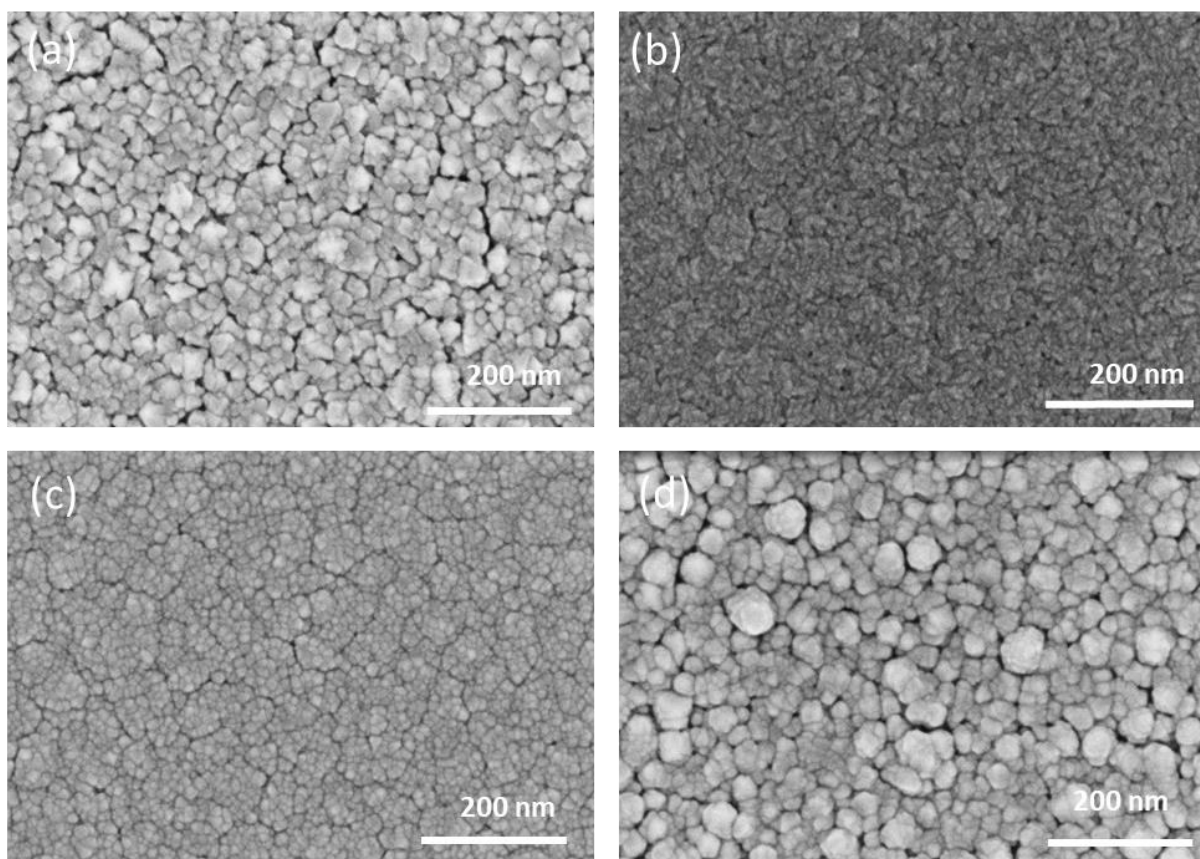

**Figure S1.** SEM image of (a) Ni (b) Mo (c) NiMo and (d) NiMo/Ni films on SiOx/Si substrate

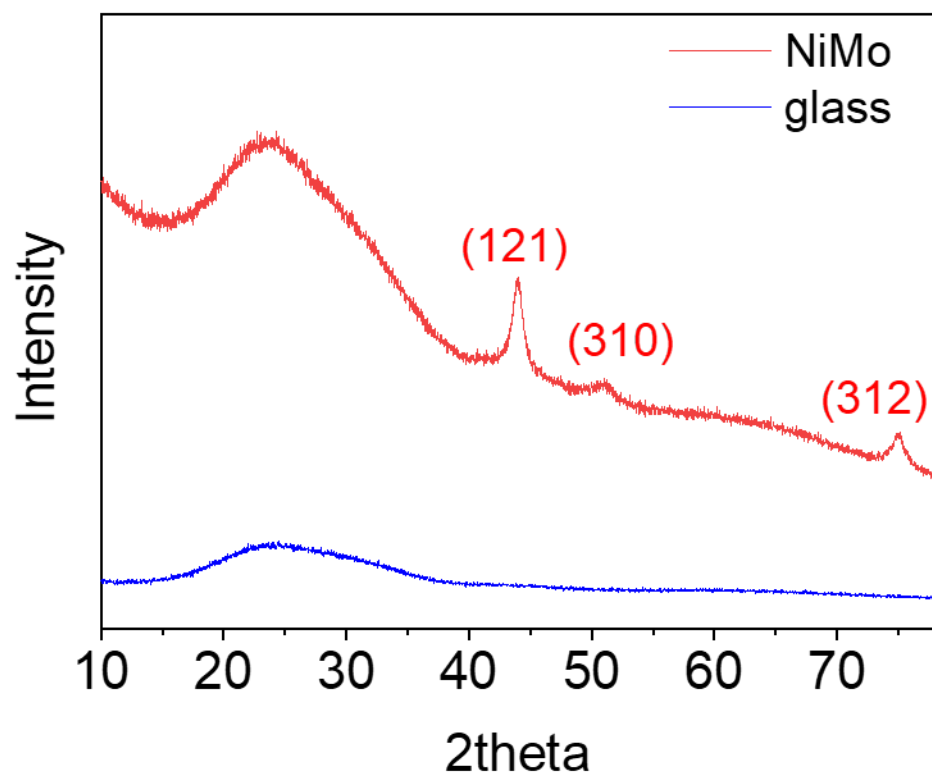

**Figure S2.** X-ray diffraction of NiMo catalyst on glass substrate.

**Table S1.** Interplaner spacing (d-spacing) calculations for hkl planes from the XRD.

| (hkl) | 2 theta | Theta | d-spacing |
|-------|---------|-------|-----------|
| 121   | 43.5    | 21.75 | 2.07      |
| 310   | 51.2    | 25.6  | 1.79      |
| 312   | 74.96   | 37.48 | 1.26      |

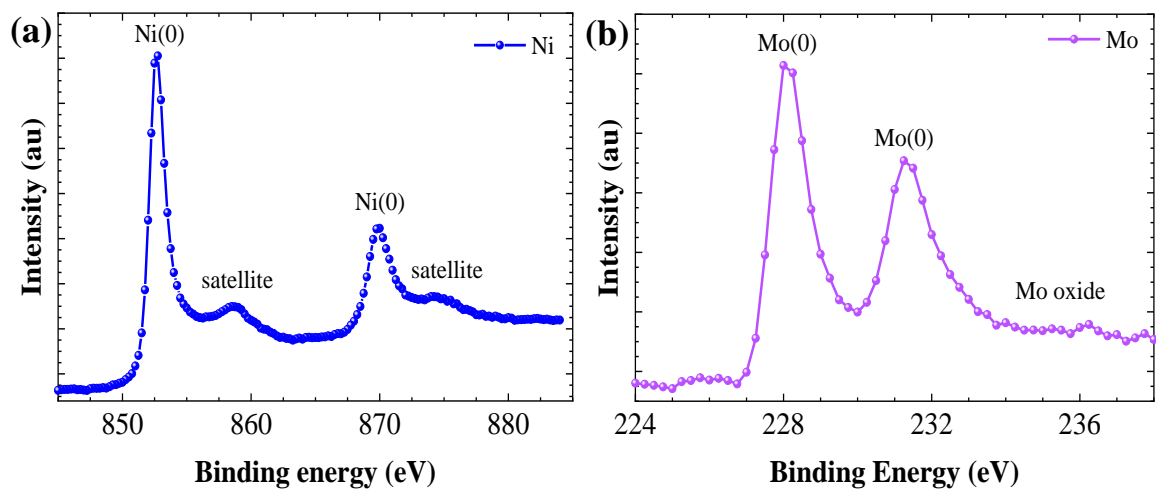

**Figure S3.** X-ray photoelectron spectra (XPS) of (a) Ni 2p and (b) Mo 3d on Si substrate.

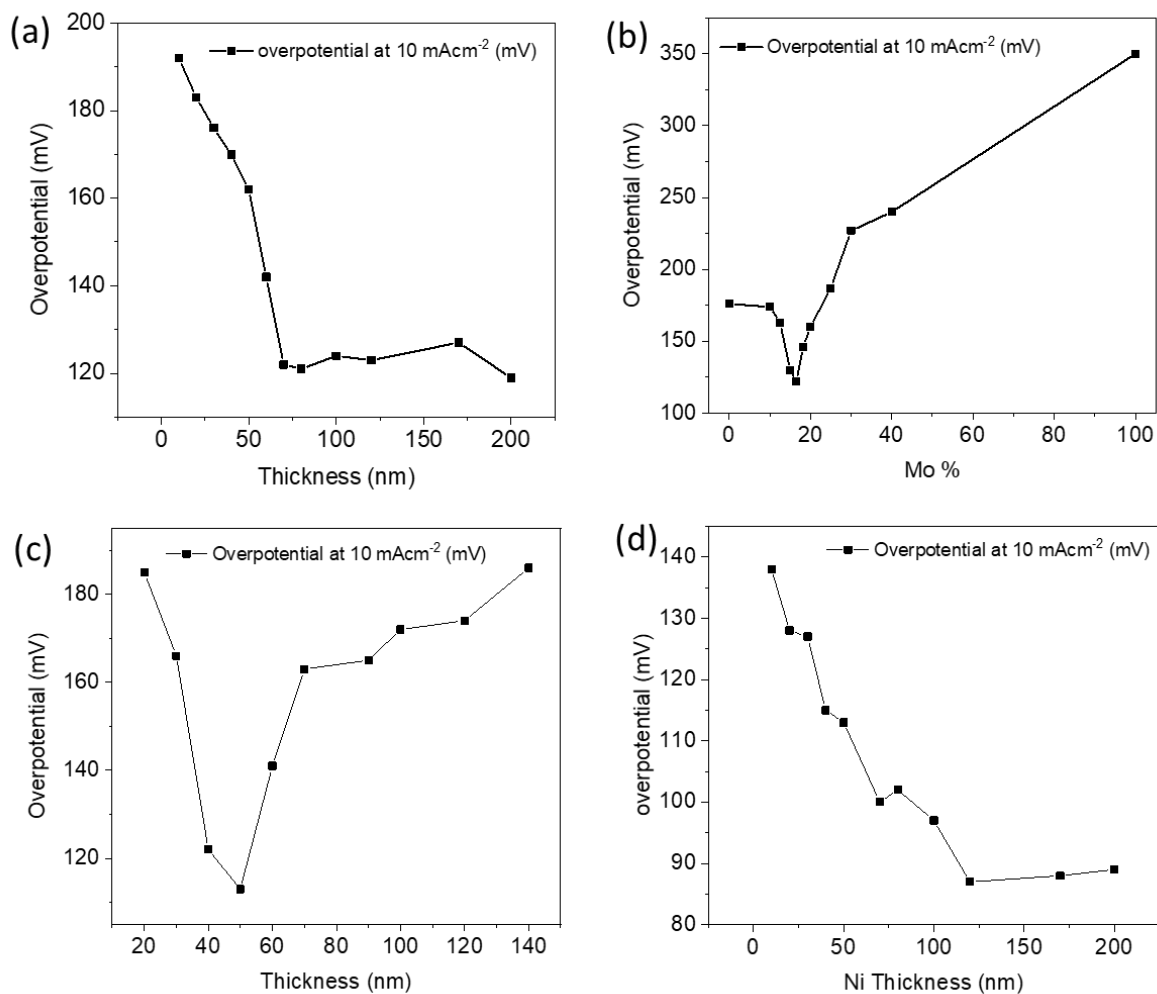

**Figure S4.** Catalyst thickness and composition optimisation (a) Ni thickness vs overpotential on FTO substrate, (b) NiMo ratio vs overpotential on FTO substrate (fixed thickness), (c) NiMo thickness vs overpotential at optimised ratio on FTO substrate, (d) Ni thickness for Ni/NiMo vs overpotential on FTO substrate (fixed ratio).

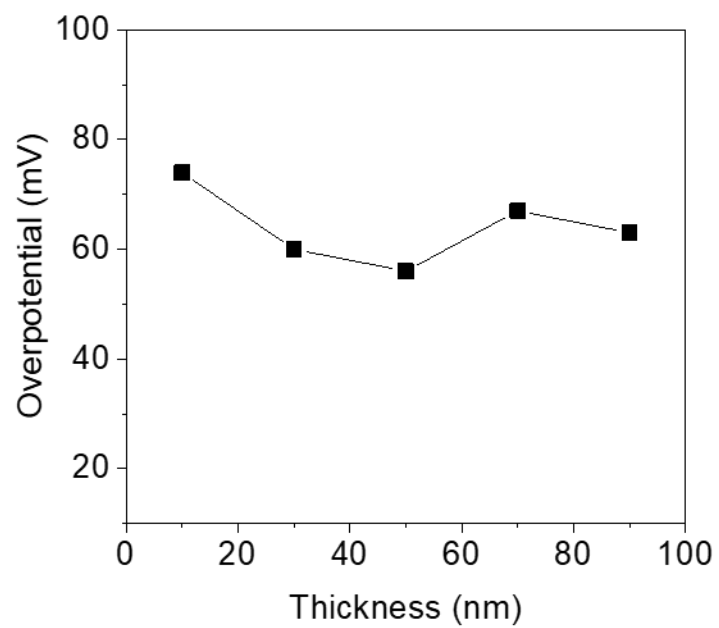

**Figure S5.** Catalyst thickness optimisation (a) Platinum thickness vs overpotential on FTO substrate

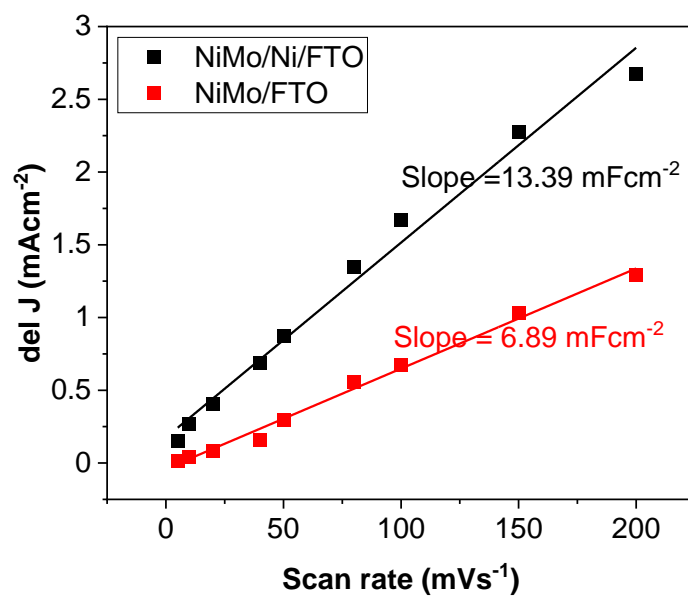

**Figure S6.** The linear fittings of the capacitive currents of NiMo/Ni/FTO (black) and NiMo/FTO (red) electrodes as a function of scan rate.

**Table S2.** TCD-FE measurements for NiMo/Ni HER catalyst

| Current density | H <sub>2</sub> area | FE_H <sub>2</sub> (Ni/NiMo) |
|-----------------|---------------------|-----------------------------|
| -10             | 3384                | 0.97                        |
| -10             | 3460                | 0.99                        |
| -10             | 3391                | 0.97                        |
| -20             | 9378                | 1.02                        |
| -20             | 9176                | 1.00                        |
| -20             | 9036                | 0.98                        |
|                 |                     | 0.988 = 98.8%               |

Pt (avg value) of H<sub>2</sub> area for Pt

@ -10 mA – 3469

@ -20 mA - 9140



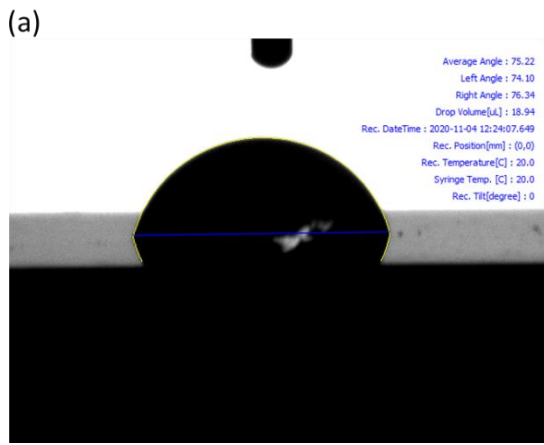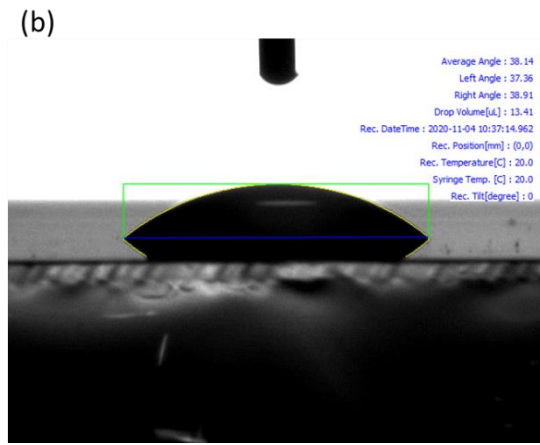

**Figure S7.** Contact angle measurements of (a) Ni/FTO (b) NiMo/FTO

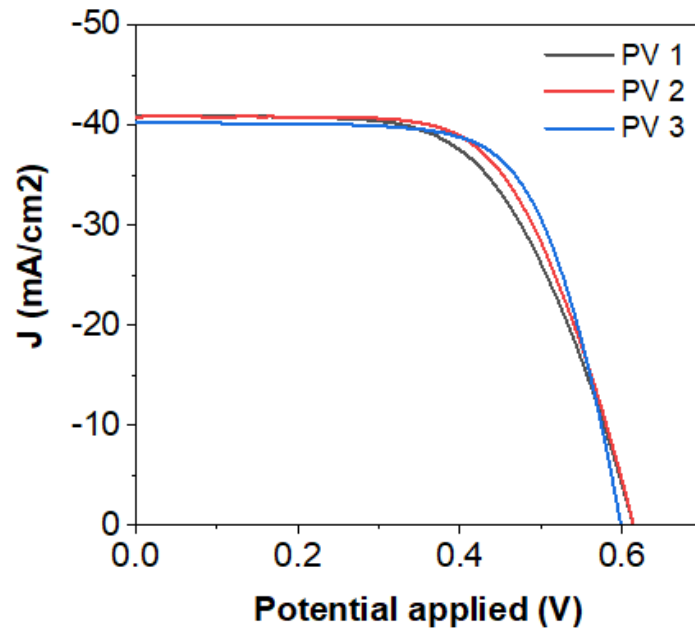

**FigureS8.** Solid state J-V characteristics of passivated Si PV with 400 nm e-beam deposited Titanium rear contact.

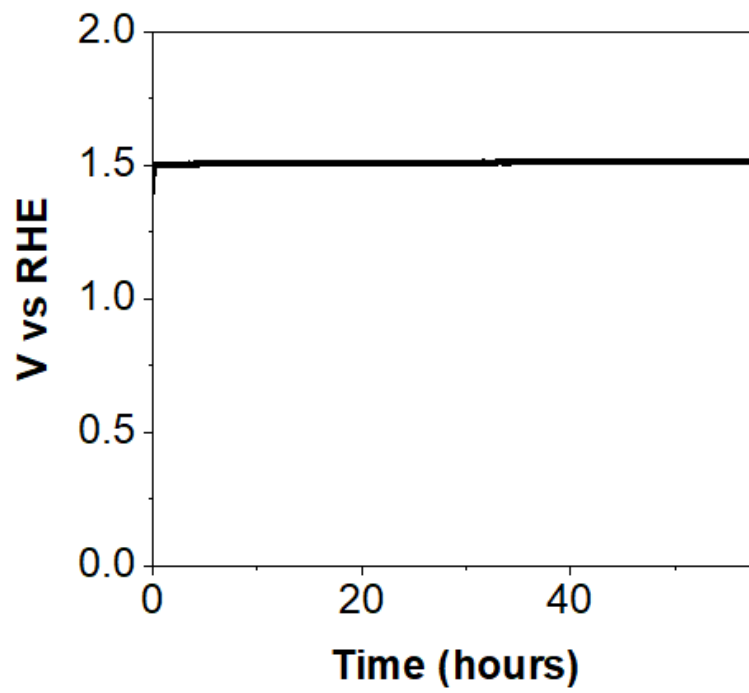

**Figure S9.** Chronopotentiometry measurements of NiFe nanocone array OER anode in three electrode configuration, 1 M KOH (at  $J = 30\text{mAcm}^{-2}$ )

**Table S3.** Silicon photocathodes integrated with earth abundant catalysts

| <b>Sno</b> | <b>Photo-cathode</b>        | <b>Structure</b> | <b>Catalyst deposition technique</b>        | <b>ABPE %</b> | <b>ref</b>          |
|------------|-----------------------------|------------------|---------------------------------------------|---------------|---------------------|
| 1          | p+/n/SiOx/polyn+/Ti/Ni/NiMo | Planer           | Physical deposition – sputter               | 10.5          | <b>Current work</b> |
| 2          | CoPS/n+pp+Si                | Planer           | Physical deposition-Metal evaporation       | 4.7           | [1]                 |
| 3          | CoP/n+pSi                   | Planer           | Physical Metal deposition + phosphodization | ~4.4          | [2]                 |
| 4          | MoSe2/n+pSi                 | Planer           | Physical deposition- Sputtering             | 3.8           | [3]                 |
| 5          | MoS2/Al2O3/n+pSi            | Planer           | Physical deposition- sputtering             | 3.6           | [4]                 |
| 6          | MoS2/Mo/n+pSi               | Planer           | Physical Metal deposition + sulfidization   | 3.1           | [5]                 |
| 7          | p+nn+Si/ Ni/ Ni3S2/ MoS2    | Planer           | Wet chemical- Electrodeposition             | 11.2          | [6]                 |
| 8          | CoWS/Ti/n+pSi               | Planer           | Wet chemical                                | 4             | [7]                 |
| 9          | NiMo /n+pSi                 | Microwire        | Wet chemical- Electrodeposition             | 10.8          | [8]                 |
| 10         | NiMo /NiSi/ n++Si           | Microwire        | Wet chemical- Electrodeposition             | 10.1          | [9]                 |
| 11         | MoSxCly/n+pp+/Si            | Micropyramids    | Chemical vapour deposition                  | 6             | [10]                |
| 12         | NiMo/n+pSi                  | Microwire        | Wet chemical- Electrodeposition             | 1.9           | [11]                |
| 13         | CoP/n+pSi                   | Microwire        | Thermal decomposition                       | 1.9           | [12]                |

**Table S4.** Unassisted solar water splitting systems with at-least one semiconductor-electrolyte junction and low-cost PV

|    | <b>PV/Photoelectrode</b>                                               | <b>HER</b>          | <b>OER</b>                     | <b>Catalyst</b> | <b>STH %</b> | <b>Ref</b>          |
|----|------------------------------------------------------------------------|---------------------|--------------------------------|-----------------|--------------|---------------------|
| 1  | <b>Perovskite PV/Si photocathode</b>                                   | <b>NiMo/Ni NiFe</b> | <b>NiFe</b>                    | <b>Low-cost</b> | <b>17</b>    | <b>Current Work</b> |
| 2  | Si PV/Si photocathode/Si photoanode                                    | NiMo                | Ni                             | Low-cost        | 9.8          | [13]                |
| 3  | 2Perovskite photoelectrode (series)                                    | CoP                 | Co <sub>3</sub> O <sub>4</sub> | Low-cost        | 6.7          | [14]                |
| 4  | 2 c-Si PV/BiVO <sub>4</sub> /CoOx photoanode                           | CoP                 | Ni                             | Low-cost        | 5.3          | [15]                |
| 5  | 3 IBC Si (series)                                                      | Pt                  | Ni                             | High-cost       | 15.6         | [16]                |
| 6  | a-Si:H/a-Si:H/uC-Si:H                                                  | Pt                  | ZnO:Co                         | High-cost       | 9.1          | [17]                |
| 7  | 2 c-Si PV/Fe <sub>2</sub> O <sub>3</sub> /BiVO <sub>4</sub> photoanode | Pt                  | NiOOH/FeOOH                    | High-cost       | 7.7          | [18]                |
| 8  | DSSC PV/WO <sub>3</sub> /BiVO <sub>4</sub> photoanode                  | Pt                  | NiOOH/FeOOH                    | High-cost       | 7.1          | [19]                |
| 9  | Si photocathode/BiVO <sub>4</sub> photoanode                           | Pt                  | FeOOH/NiOOH                    | High-cost       | 3.7          | [20]                |
| 10 | Perovskite PV/Si photocathode                                          | Pt                  | IrRu (DSA)                     | High-cost       | 17.5         | [21]                |

|    |                                                    |    |                  |           |     |      |
|----|----------------------------------------------------|----|------------------|-----------|-----|------|
| 11 | a-Si:H/ $\mu$ c-Si:H/c-Si                          | Pt | RuO <sub>2</sub> | High-cost | 9.5 | [22] |
| 12 | Perovskite PV/ CuInGa photocathode                 |    | IrRu             | High-cost | 6.3 | [23] |
| 13 | DSSC/BiVo <sub>4</sub> /WO <sub>3</sub> photoanode | Pt |                  | High-cost | 5.7 | [24] |

---



## REFERENCES

1. Cabán-Acevedo, M., et al., *Efficient hydrogen evolution catalysis using ternary pyrite-type cobalt phosphosulphide*. *Nature materials*, 2015. **14**(12): p. 1245-1251.
2. Hellstern, T.R., et al., *Engineering cobalt phosphide (CoP) thin film catalysts for enhanced hydrogen evolution activity on silicon photocathodes*. *Advanced Energy Materials*, 2016. **6**(4): p. 1501758.
3. Huang, G., et al., *Integrated MoSe<sub>2</sub> with n+ p-Si photocathodes for solar water splitting with high efficiency and stability*. *Applied Physics Letters*, 2018. **112**(1): p. 013902.
4. Fan, R., et al., *Efficient and stable silicon photocathodes coated with vertically standing nano-MoS<sub>2</sub> films for solar hydrogen production*. *ACS applied materials & interfaces*, 2017. **9**(7): p. 6123-6129.
5. Benck, J.D., et al., *Designing active and stable silicon photocathodes for solar hydrogen production using molybdenum sulfide nanomaterials*. *Advanced Energy Materials*, 2014. **4**(18): p. 1400739.
6. Fan, R., et al., *Highly efficient and stable Si photocathode with hierarchical MoS<sub>2</sub>/Ni<sub>3</sub>S<sub>2</sub> catalyst for solar hydrogen production in alkaline media*. 2020. **71**: p. 104631.
7. Fan, R., et al., *Efficient n+ p-Si photocathodes for solar H<sub>2</sub> production catalyzed by Co-WS and stabilized by Ti buffer layer*. *Applied Catalysis B: Environmental*, 2018. **237**: p. 158-165.
8. Vijselaar, W., et al., *Spatial decoupling of light absorption and catalytic activity of Ni–Mo-loaded high-aspect-ratio silicon microwire photocathodes*. 2018. **3**(3): p. 185-192.
9. Vijselaar, W., et al., *Efficient and stable silicon microwire photocathodes with a nickel silicide interlayer for operation in strongly alkaline solutions*. *ACS energy letters*, 2018. **3**(5): p. 1086-1092.
10. Ding, Q., et al., *Designing Efficient Solar-Driven Hydrogen Evolution Photocathodes Using Semitransparent MoQxCl<sub>y</sub> (Q= S, Se) Catalysts on Si Micropyramids*. *Advanced Materials*, 2015. **27**(41): p. 6511-6518.
11. Warren, E.L., et al., *Hydrogen-evolution characteristics of Ni–Mo-coated, radial junction, n+ p-silicon microwire array photocathodes*. *Energy & Environmental Science*, 2012. **5**(11): p. 9653-9661.
12. Roske, C.W., et al., *Comparison of the performance of cop-coated and pt-coated radial junction n+ p-silicon microwire-array photocathodes for the sunlight-driven reduction of water to H<sub>2</sub> (g)*. *The journal of physical chemistry letters*, 2015. **6**(9): p. 1679-1683.
13. Fan, R., et al., *Unassisted solar water splitting with 9.8% efficiency and over 100 h stability based on Si solar cells and photoelectrodes catalyzed by bifunctional Ni–Mo/Ni*. *Journal of Materials Chemistry A*, 2019. **7**(5): p. 2200-2209.
14. Liang, J., et al., *A low-cost and high-efficiency integrated device toward solar-driven water splitting*. *ACS nano*, 2020. **14**(5): p. 5426-5434.
15. Kim, J.H., et al., *A precious metal-free solar water splitting cell with a bifunctional cobalt phosphide electrocatalyst and doubly promoted bismuth vanadate photoanode*. *Journal of Materials Chemistry A*, 2018. **6**(3): p. 1266-1274.
16. Fu, H.-C., et al., *Spontaneous solar water splitting with decoupling of light absorption and electrocatalysis using silicon back-buried junction*. 2020. **11**(1): p. 1-9.
17. Kirner, S., et al., *Wafer surface tuning for a-Si: H/μc-Si: H/c-Si triple junction solar cells for application in water splitting*. *Energy Procedia*, 2016. **102**: p. 126-135.
18. Kim, J.H., et al., *Hetero-type dual photoanodes for unbiased solar water splitting with extended light harvesting*. *Nature communications*, 2016. **7**(1): p. 1-9.
19. Shi, X., et al., *Unassisted photoelectrochemical water splitting exceeding 7% solar-to-hydrogen conversion efficiency using photon recycling*. *Nature communications*, 2016. **7**(1): p. 1-6.
20. Liu, B., et al., *Double-Side Si Photoelectrode Enabled by Chemical Passivation for Photoelectrochemical Hydrogen and Oxygen Evolution Reactions*. 2020: p. 2007222.
21. Karuturi, S.K., et al., *Over 17% Efficiency Stand-Alone Solar Water Splitting Enabled by Perovskite-Silicon Tandem Absorbers*. *Advanced Energy Materials*, 2020: p. 2000772.
22. Urbain, F., et al., *Multijunction Si photocathodes with tunable photovoltages from 2.0 V to 2.8 V for light induced water splitting*. *Energy & environmental science*, 2016. **9**(1): p. 145-154.
23. Luo, J., et al., *Targeting Ideal Dual-Absorber Tandem Water Splitting Using Perovskite Photovoltaics and CuIn<sub>x</sub>Ga<sub>1-x</sub>Se<sub>2</sub> Photocathodes*. *Advanced Energy Materials*, 2015. **5**(24): p. 1501520.



24. Shi, X., et al., *Unassisted photoelectrochemical water splitting beyond 5.7% solar-to-hydrogen conversion efficiency by a wireless monolithic photoanode/dye-sensitised solar cell tandem device*. *Nano Energy*, 2015. **13**: p. 182-191.
